# Supplementary material for: Sustainable Wheat Production and Food Security of Domestic Wheat in Tajikistan: Implications of Seed Health and Protein Quality
Source: MDPI journal article supplement (doi:10.3390/ijerph18115751), 2021-05-27
Supplement: s1 [file s1]

## Supplementary material

**Table S2.**

### General wheat management practices

| ID  | Variety name     | Growing purpose | Planting time | Planting method, both years | Seed Treatment     | Seed rate (kg/ha) | Pesticide use in the field | Weed control         | Irrigation type | Previous crop (rotation) |        | Type | Fertiliser     |                    |
|-----|------------------|-----------------|---------------|-----------------------------|--------------------|-------------------|----------------------------|----------------------|-----------------|--------------------------|--------|------|----------------|--------------------|
|     |                  |                 |               |                             |                    |                   |                            |                      |                 | 2011                     | 2012   |      | Amount (kg/ha) | Applied time       |
| F1  | Unknown          | grain           | Oct.-Nov.     | hand broadcast              | no                 | 180-200           | No                         | No                   | Irrigated       | watermelon               | cotton | N    | 90-100         | Tillering / Earing |
| F2  | Unknown          | grain           | Oct.-Nov.     | hand broadcast              | no                 | 180-200           | No                         | No                   | Irrigated       | watermelon               | cotton | N    | 100            | Tillering / Earing |
| F3  | Unknown          | grain           | Oct.-Nov.     | hand broadcast              | no                 | 180-200           | No                         | No                   | Irrigated       | cotton                   | cotton | N    | 120            | Booting            |
| F4  | Unknown          | grain           | Oct.-Nov.     | hand broadcast              | no                 | 180-200           | No                         | No                   | Irrigated       | fallow                   | cotton | N    | 30-50          | Tillering          |
| F5  | Lastochka        | seed/grain      | Oct.-Nov.     | drill                       | Dividend / Vitavax | 180-200           | No                         | Hand weeding         | Irrigated       | cotton                   | maize  | N    | 120            | Booting            |
| F6  | Krasnodar 99     | grain           | Oct.-Nov.     | hand broadcast              | no                 | 180-200           | No                         | Hand weeding         | Irrigated       | maize                    | potato | N    | 30-50          | Booting            |
| F7  | Besribey         | seed/grain      | Nov.          | drill                       | Vitavax            | 200-220           | No                         | No                   | Irrigated       | cotton                   | maize  | N    | 120            | Booting / Earing   |
| F8  | Steklovidnaya 24 | grain           | Oct.          | hand broadcast              | no                 | 180-200           | No                         | No                   | Rainfed         | chick pea                | wheat  | N    | 120            | Booting            |
| F9  | Unknown          | grain           | Nov.          | hand broadcast              | no                 | 180-200           | No                         | Hand weeding         | Irrigated       | watermelon               | wheat  | N    | 100            | Tillering / Earing |
| F10 | Jayhun           | grain           | Oct.          | drill                       | no                 | 180-200           | No                         | Hand weeding         | Irrigated       | cotton                   | cotton | N    | 120            | Earing             |
| F11 | Umanka           | grain           | Sep.-Oct.     | broadcast                   | no                 | 220-240           | No                         | Hand weeding         | Irrigated       | potato                   | potato | N    | 60             | Earing             |
| F12 | Steklovidnaya 24 | grain           | Oct.          | hand broadcast              | no                 | 220-240           | No                         | Herbicide (Gezagard) | Irrigated       | potato                   | potato | N    | 90             | Earing             |

|     |           |            |           |                   |                   |         |    |                                           |           |                    |            |   |         |                           |
|-----|-----------|------------|-----------|-------------------|-------------------|---------|----|-------------------------------------------|-----------|--------------------|------------|---|---------|---------------------------|
| F13 | Sadokat   | seed/grain | Nov.-Dec. | hand<br>broadcast | TMTD              | 180-200 | No | No                                        | Irrigated | rape for<br>fodder | maize      | N | 120     | Booting<br>/ Earing       |
| F14 | Starshina | seed/grain | Sep.-Oct. | hand<br>broadcast | TMTD /<br>Vitavax | 200-220 | No | hand weeding                              | Irrigated | cotton             | cotton     | N | 120     | Booting<br>/ Earing       |
| F15 | Yasaul    | seed/grain | Sep.-Oct. | drill             | Raksill           | 200-220 | No | hand weeding /<br>herbicide<br>(Granstar) | Irrigated | tomato             | watermelon | N | 150     | Booting<br>/ Earing       |
| F16 | Gratsiya  | seed/grain | Oct.      | drill             | Raksill           | 200-220 | No | hand weeding /<br>herbicide<br>(Granstar) | Irrigated | tomato             | tomato     | N | 150     | Booting<br>/ Earing       |
| F17 | Starshina | seed/grain | Oct.      | drill             | no                | 200-220 | No | No                                        | Irrigated | maize              | tomato     | N | 150-180 | Tillering<br>/ Earing     |
| F18 | Jayhun    | seed/grain | Oct.-Nov. | drill             | no                | 200     | No | No                                        | Irrigated | cotton             | wheat      | N | 110     | Booting                   |
| F19 | L115      | seed/grain | Oct.-Nov. | drill             | no                | 200     | No | No                                        | Irrigated | cotton             | barley     | N | 160     | Tillering<br>/<br>Booting |
| F20 | Yasaul    | seed/grain | Oct.-Nov. | drill             | Dividend          | 200     | No | No                                        | Irrigated | cotton             | cotton     | N | 150     | Booting<br>/ Earing       |
| F21 | Besribey  | grain      | Oct.      | hand<br>broadcast | no                | 200     | No | No                                        | Rainfed   | potato             | potato     | N | 100     | Booting                   |

**Table S3.****Summary of disease incidence and major constraints to wheat production in the fields surveyed**

| Sample ID | Growing stage                                |                              | Loose smut   |              | Common bunt  |              | Other diseases              |              | Weed density |        |
|-----------|----------------------------------------------|------------------------------|--------------|--------------|--------------|--------------|-----------------------------|--------------|--------------|--------|
|           | 2011                                         | 2012                         | 2011         | 2012         | 2011         | 2012         | 2011                        | 2012         | 2011         | 2012   |
| F1        | milk                                         | flowering to milk stage      | Not recorded | Not recorded | Not recorded | Not recorded | Septoria, YR (2-3%)         | Septoria, TS | high         | medium |
| F2        | milk                                         | flowering to milk stage      | Not recorded | Not recorded | Not recorded | Not recorded | LS                          |              | medium       | high   |
| F3        | milk                                         | flowering to milk stage      | Not recorded | Not recorded | >50%         | Not recorded | LS                          |              | medium       | medium |
| F4        | milk                                         | milk                         | Not recorded | Not recorded | <25%         | Not recorded | LS                          | TS           | medium       | medium |
| F5        | flowering                                    | flowering, beginning of milk | Not recorded | Not recorded | Not recorded | Not recorded | YR (2-3%), TS and other LSs |              | medium       | low    |
| F6        | flowering                                    | dough                        | Not recorded | Not recorded | Not recorded | Not recorded | YR and TS                   | TS, PM       | medium       | medium |
| F7        | flowering                                    | flowering                    | <1%          | Not recorded | Not recorded | Not recorded | TS                          | TS           | medium       | medium |
| F8        | not even, some in heading some are flowering | flowering                    | Not recorded | Not recorded | Not recorded | Not recorded | TS, YR, PM                  |              | high         | high   |
| F9        | dough stage                                  | flowering-early milk         | Not recorded | Not recorded | Not recorded | Not recorded | Plant were too dry          |              | high         | high   |
| F10       | milk                                         | flow                         | Not recorded | <1%          | Not recorded | Not recorded | TS                          | TS           | medium       | medium |
| F11       | flowering                                    | flowering-early milk         | Not recorded | Not recorded | Not recorded | Not recorded | LS                          | PM           | low          | medium |
| F12       | flowering                                    | early flowering              | Not recorded | Not recorded | Not recorded | Not recorded | LS                          |              | low          | high   |

|     |            |               |              |              |              |              |                 |                           |        |        |
|-----|------------|---------------|--------------|--------------|--------------|--------------|-----------------|---------------------------|--------|--------|
| F13 | milk       | milk to dough | Not recorded | Very low     | 5 %          | Not recorded | YR, LR          | LR,                       | high   | medium |
| F14 | milk-dough | dough         | Not recorded | Not recorded | Not recorded | Not recorded |                 |                           | high   | medium |
| F15 | milk       | early milk    | Not recorded | Not recorded | Not recorded | Not recorded | TS and few rust | TS                        | high   | medium |
| F16 | milk       | milk          | Not recorded | Not recorded | Not recorded | Not recorded | TS              | TS                        | high   | low    |
| F17 | milk       | milk          | Not recorded | Not recorded | Not recorded | Not recorded | TS              | YR (v.low).<br>LR (v.low) | high   | low    |
| F18 | matured    | dough         | Not recorded | Very low     | Not recorded | Not recorded | LS              | TS, root rot              | medium | high   |
| F19 | dough      | milk          | Not recorded | Not recorded | Not recorded | Not recorded | TS and YR (few) |                           | high   | high   |
| F20 | dough      | milk          | Not recorded | Not recorded | Not recorded | Not recorded | LS              | TS, root rot              | med    | high   |
| F21 | milk-dough | milk          | Not recorded | Not recorded | Not recorded | Not recorded | LS and TS       | Septoria,<br>TS           | high   | high   |

Note: YR-yellow rust; TS-Tan spot; LS-leaf spot; PM-powdery mildew;
