# Supplementary material for: Sustainable Wheat Production and Food Security of Domestic Wheat in Tajikistan: Implications of Seed Health and Protein Quality
Source: MDPI journal article supplement (doi:10.3390/ijerph18115751), 2021-05-27
Supplement: s1 [file s1]

# QUESTIONNAIRE

## Wheat seed-borne diseases survey in Tajikistan

.....  
survey date

.....  
round

.....  
conducted by

### General Information about Farm

|                          |                       |                               |
|--------------------------|-----------------------|-------------------------------|
| Farm name: .....         |                       |                               |
| Address: .....           | .....                 | .....                         |
|                          | region/location       | postal address                |
| Contacts: .....          | .....                 | .....                         |
|                          | tel./fax/mob.         | e-mail/other                  |
| Representative: .....    | .....                 | .....                         |
|                          | name                  | contacts: tel./mob. position  |
| Wheat in the farm: ..... | .....                 | .....                         |
|                          | total wheat area (ha) | for seed prod. (ha) varieties |

### Field and crop management information

|                                                                                                                      |                      |                                                                |
|----------------------------------------------------------------------------------------------------------------------|----------------------|----------------------------------------------------------------|
| Latitude: N S .....                                                                                                  | Longitude: E W ..... | Altitude (m): .....                                            |
| Field: .....                                                                                                         | .....                | .....                                                          |
|                                                                                                                      | size (ha)            | previous crop variety                                          |
| Planting: .....                                                                                                      | .....                | .....                                                          |
|                                                                                                                      | planting date        | method (row/broadcast) seed treatment (dose) seed rate (kg/ha) |
| Crop type: Food: <input type="checkbox"/> Seed: <input type="checkbox"/> Feed: <input type="checkbox"/> Other: ..... |                      |                                                                |
| Management:                                                                                                          |                      |                                                                |
| <i>Fertilizer:</i> .....                                                                                             | .....                | .....                                                          |
|                                                                                                                      | type (N, P, K)       | rate for each type (kg/ha, pure) time                          |
| <i>Pesticide:</i> .....                                                                                              | .....                | .....                                                          |
|                                                                                                                      | type (ins., fung.)   | dose (for each, l/ha-pure) time                                |
| <i>Weed control:</i> hand weeding / chemical control / other .....                                                   |                      |                                                                |
| <i>Irrigation:</i> irrigated / rain fed                                                                              |                      |                                                                |
| <i>Irrigation time:</i> .....                                                                                        | .....                | .....                                                          |
|                                                                                                                      | irrigation type      | dates of 1st, 2nd and following date of last irrigation/rain   |

### Field survey

|                             |                           |                      |
|-----------------------------|---------------------------|----------------------|
| Observation: .....          | .....                     | .....                |
|                             | crop view                 | growth stage lodging |
| Weed: .....                 | .....                     | .....                |
|                             | density (high, med., low) | predominant species  |
| Diseases: Loose smut: ..... |                           |                      |
| Common bunt: .....          |                           |                      |
| Other diseases: .....       |                           |                      |
| (name and incidence         | .....                     | .....                |
| (occurrence) level)         | .....                     | .....                |
| Notes: .....                |                           |                      |
| .....                       |                           |                      |
| .....                       |                           |                      |
